# Supplementary material for: Interaction with PALB2 Is Essential for Maintenance of Genomic Integrity by BRCA2
Source: PubMed Central journal article supplement (PMC4973925; doi:10.1371/journal.pgen.1006236), 2016-08-04

# S1 Fig

**A**

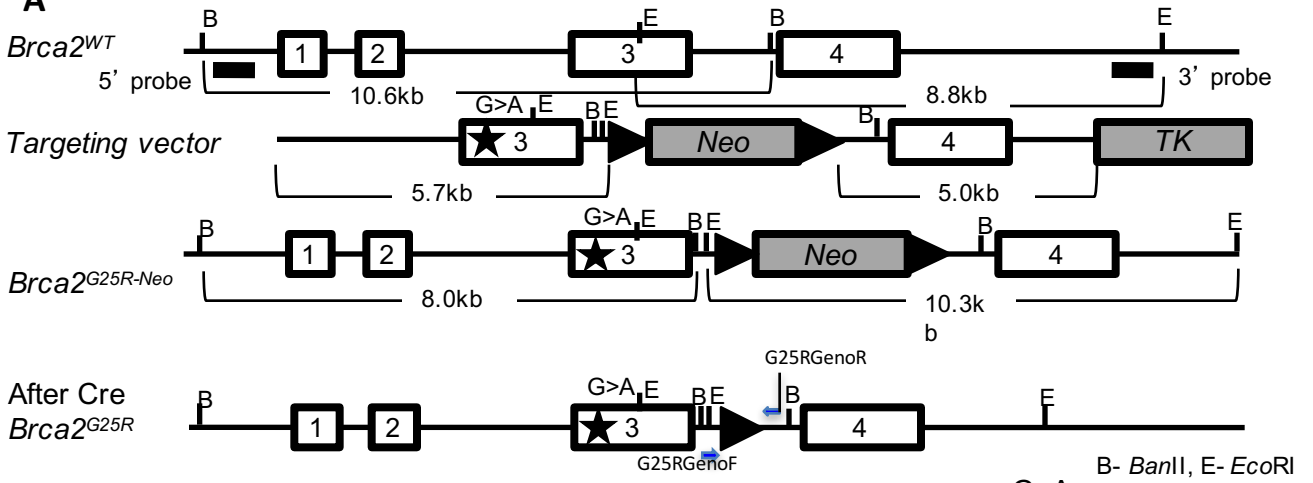

**B**

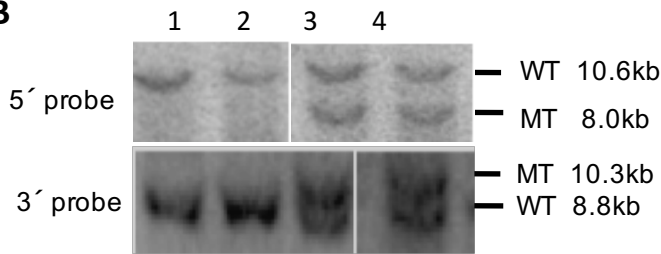

**C**

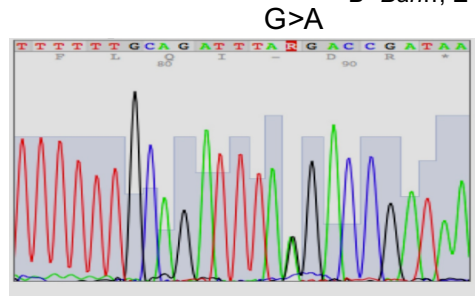

**D**

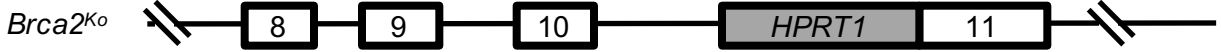

**E**

*Brca2*<sup>G25R</sup> Genotyping PCR

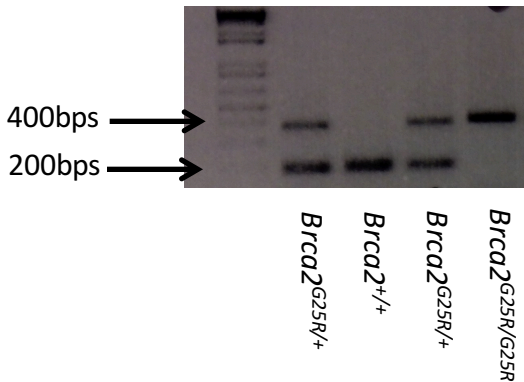

Supplement: pgen.1006236.s001.pdf [file pgen.1006236.s001.pdf]
