# Supplementary material for: Interaction with PALB2 Is Essential for Maintenance of Genomic Integrity by BRCA2
Source: PubMed Central journal article supplement (PMC4973925; doi:10.1371/journal.pgen.1006236), 2016-08-04

S4 Fig

A

Female

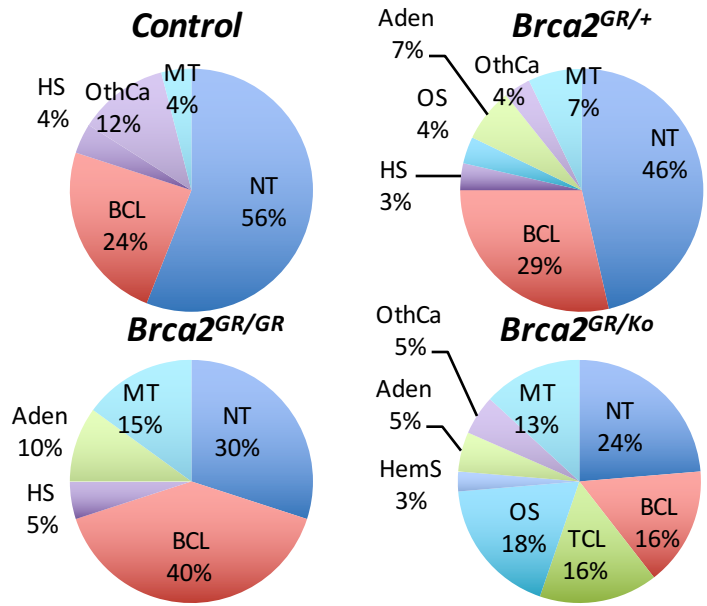

B

Male

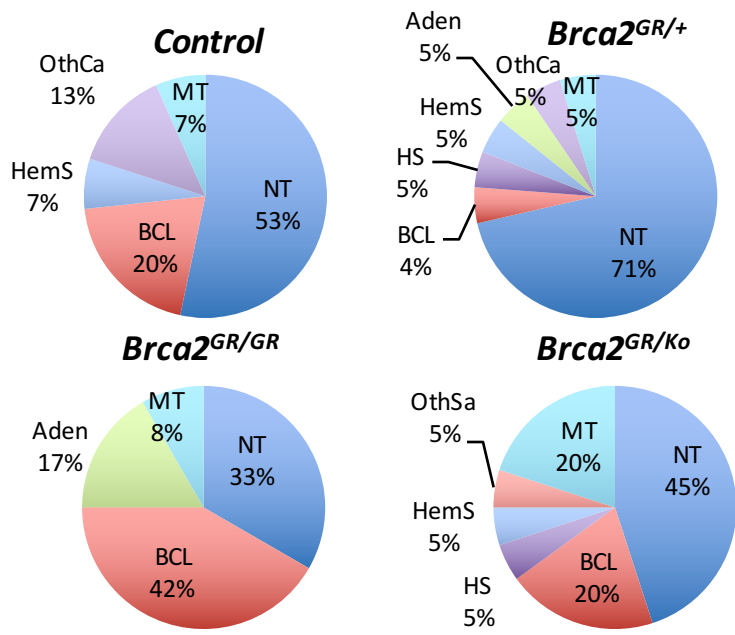

Supplement: pgen.1006236.s004.pdf [file pgen.1006236.s004.pdf]
