# Supplementary material for: Interaction with PALB2 Is Essential for Maintenance of Genomic Integrity by BRCA2
Source: PubMed Central journal article supplement (PMC4973925; doi:10.1371/journal.pgen.1006236), 2016-08-04

S5 Fig

A

Female *Trp53<sup>Ko/+</sup>*

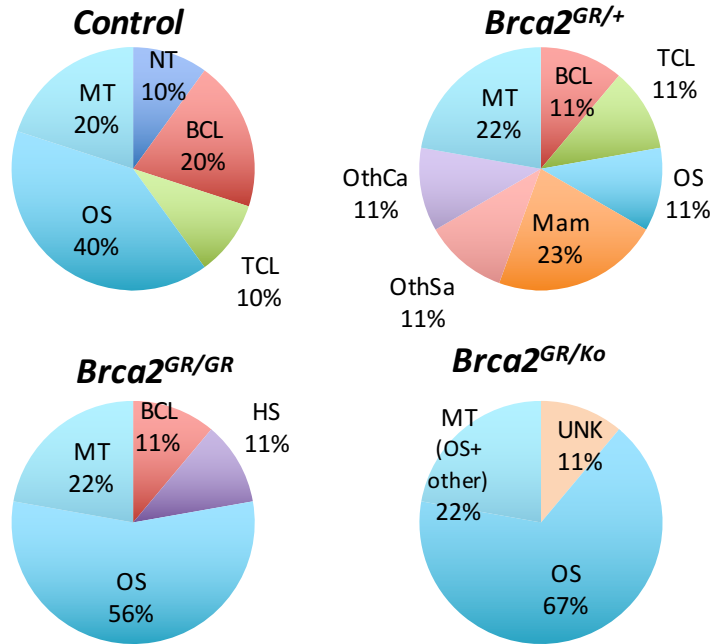

B

Male *Trp53<sup>Ko/+</sup>*

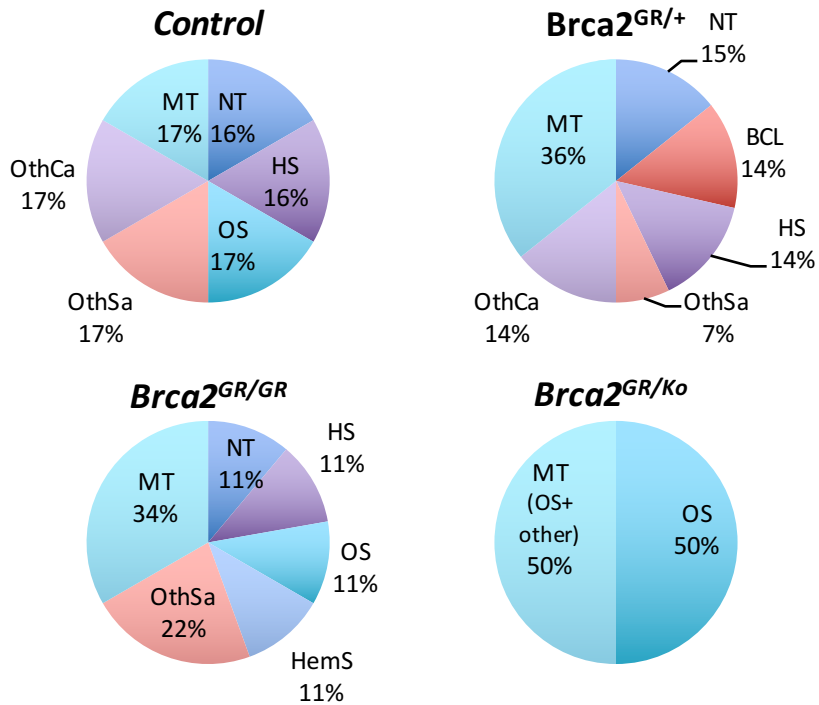

Supplement: pgen.1006236.s005.pdf [file pgen.1006236.s005.pdf]
