# Supplementary material for: Interaction with PALB2 Is Essential for Maintenance of Genomic Integrity by BRCA2
Source: PubMed Central journal article supplement (PMC4973925; doi:10.1371/journal.pgen.1006236), 2016-08-04

S7 Fig

*Brca2*<sup>GR/+</sup>;*Trp53*<sup>Ko/+</sup>

*Brca2*<sup>GR/GR</sup>;*Trp53*<sup>Ko/+</sup>

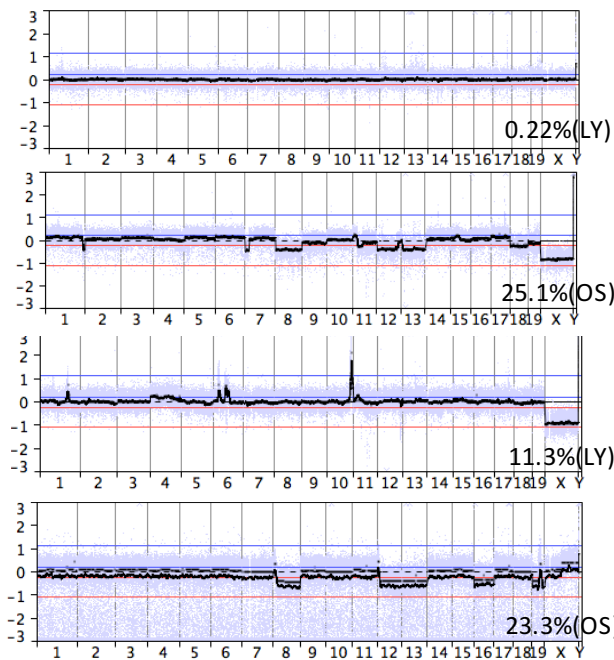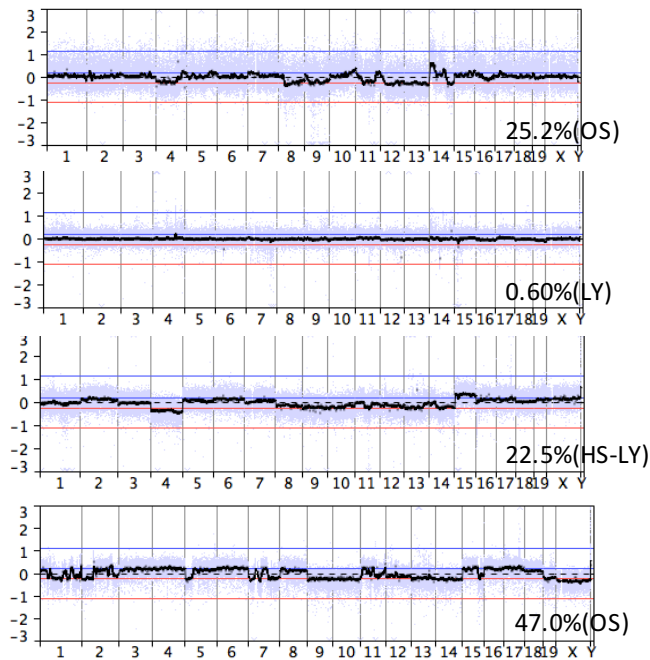

*Brca2*<sup>GR/Ko</sup>;*Trp53*<sup>Ko/+</sup>

*Brca2*<sup>GR/GR</sup>;*Palb2*<sup>Ko/+</sup>;*Trp53*<sup>Ko/+</sup>

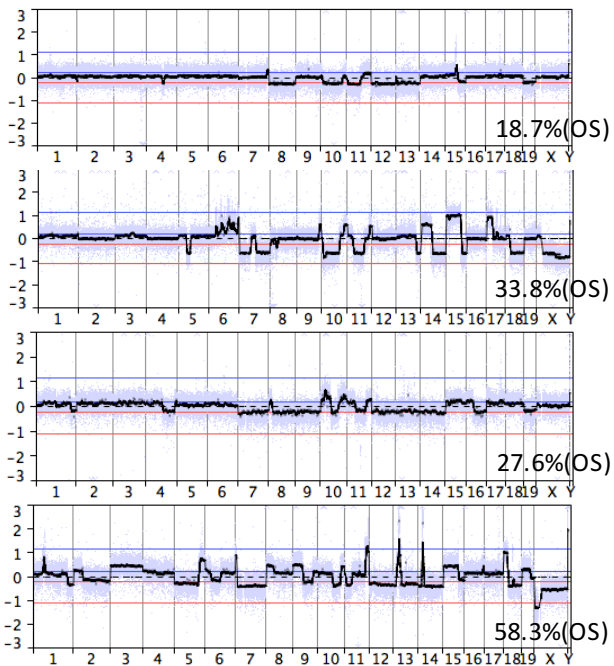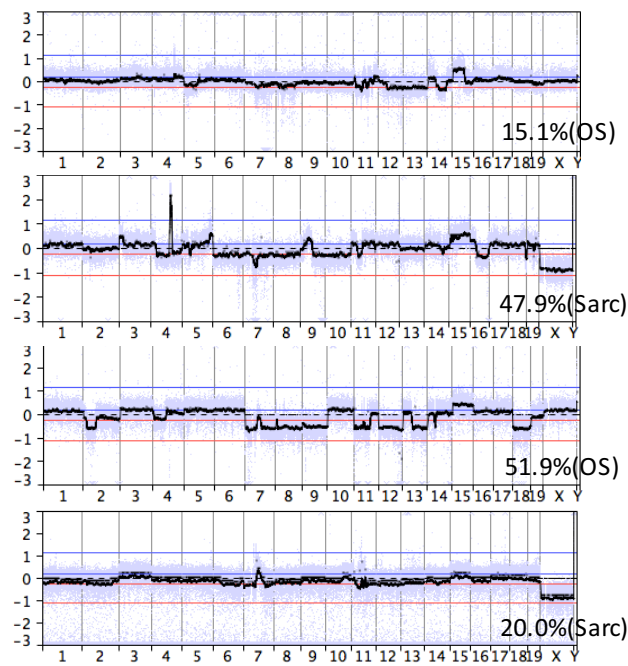

Supplement: pgen.1006236.s007.pdf [file pgen.1006236.s007.pdf]
